# Supplementary material
Source: publisher figshare collection journal article supplement (https://acs.figshare.com/ndownloader/files/4644286)

# Supporting Information

## Spectral characteristics of light harvesting, electron injection, and steady state charge collection in pressed TiO<sub>2</sub> dye solar cells

*Janne Halme,<sup>\*,†</sup> Gerrit Boschloo,<sup>‡</sup> Anders Hagfeldt,<sup>‡</sup> Peter Lund<sup>†</sup>*

Laboratory of Advanced Energy Systems, Department of Engineering Physics and  
Mathematics, Helsinki University of Technology, P.O. BOX 5100, FIN-02015 TKK,  
Finland, and Center of Molecular Devices, Department of Chemistry, Physical  
Chemistry, Royal Institute of Technology (KTH), Teknikringen 30, SE-10044  
Stockholm, Sweden

Tel.: +35894513217, Fax: +35894513195, E-mail: [janne.halme@tkk.fi](mailto:janne.halme@tkk.fi)

Title running head: Spectral characteristics of dye solar cells

\* Corresponding author

† Helsinki University of Technology

‡ Royal Institute of Technology

## Figure Captions

**Figure S1.** Results of the  $\eta_{\text{APCE-ratio}}$  method for the P cells. (a) experimental  $\eta_{\text{APCE,CE}}/\eta_{\text{APCE,PE}}$  data; (b)  $L$  and (c)  $\eta_{\text{INJ}}$ , estimated by eqs B1 and B2 using experimental values for  $d$ ,  $\alpha$ , and  $\eta_{\text{APCE,CE}}/\eta_{\text{APCE,PE}}$ . For the 5 and 6 layer films, the  $L$  and  $\eta_{\text{INJ}}$  estimates below 570 nm are inaccurate, most likely due to very low  $\eta_{\text{APCE,CE}}/\eta_{\text{APCE,PE}}$  values and are thus excluded from the figures (b) and (c) for clarity. The method fails above certain wavelength, as indicated by the rapid increase of  $\eta_{\text{INJ}}$  estimate as  $\lambda$  increases. The wavelength at which this occurs is the shorter the thinner the photoelectrode film.

**Figure S1**

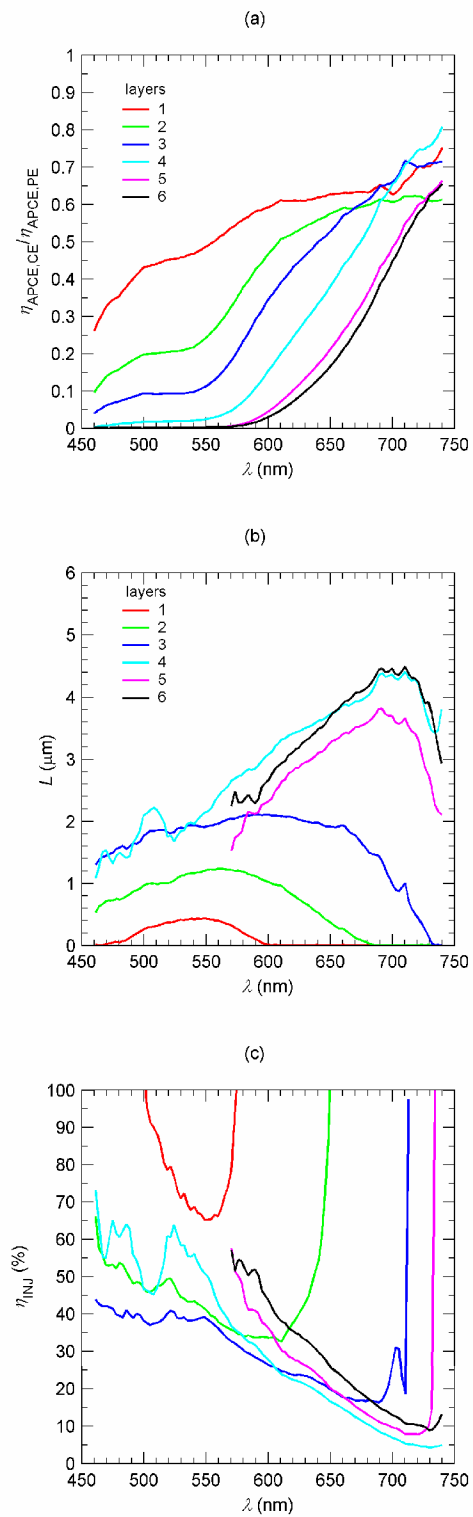

Supplement: Supplementary file 1 [file 4644286]
